# Supplementary material for: Urban building demolitions, firearm violence and drug crime
Source: Springer Nature journal article supplement (doi:10.1007/s10865-019-00031-6), 2019-08-01
Supplement: MOESM1 [file 17029010]

**Supplemental Table 1**

*Propensity score regression coefficients (log-odds) for matching variables*

| **Variable** | **Coefficient** | ***p*** |
| --- | --- | --- |
| Males ages 15-34 (%) | < 0.01 | 0.75 |
| Population (n) | > -0.01 | 0.76 |
| Non-Hispanic White (%) | 1.78** | 0.01 |
| Concentrated disadvantage (factor) | 0.28* | 0.03 |
| Median household income (log USD) | -0.34 | 0.19 |
| Parcels w/ structures (n) | < 0.01*** | 0.00 |
| Residential vacancy (%) | 11.41*** | 0.00 |
| Residential vacancy since 2009 (%) | -7.35*** | 0.00 |

*Note*. Regression coefficients between 0.01 and -0.01 are reported as “ < 0.01” if positive and “ > -0.01” if negative. Model was a multiple logistic regression estimating log-odds of receiving demolitions treatment ( > 5 demolitions prior to Q3 2015).

* p < 0.05

** p < 0.01

*** p < 0.001
