# Supplementary material for: Urban building demolitions, firearm violence and drug crime
Source: Springer Nature journal article supplement (doi:10.1007/s10865-019-00031-6), 2019-08-01
Supplement: MOESM2 [file 17029010]

**Supplemental Table 2**

*Spatial lag regression results*

|  | Model 1  (Main model) | | Model 2  (Add spatial lag term) | | Model 3  (Add interaction) | |
| --- | --- | --- | --- | --- | --- | --- |
| **Variable** | **IRR**a | ***p*** | **IRR** | ***p*** | **IRR** | ***p*** |
| *Outcome: firearm assaults* | | | | | | |
| Treatment indicator | 0.89 | 0.01 | 0.89 | 0.01 | 0.84 | 0.01 |
| Spatial lag term | - | - | 0.98 | 0.22 | 0.98 | 0.14 |
| Interaction: treatment x spatial lag | - | - | - | - | 1.06 | 0.28 |
| *Outcome: illegal drug violations* | | | | | | |
| Treatment indicator | 0.95 | 0.98 | 0.94 | 0.54 | 1.06 | 0.98 |
| Spatial lag term | - | - | 0.99 | 0.53 | 1.00 | 0.77 |
| Interaction: treatment x spatial lag | - | - | - | - | 0.88 | 0.30 |

*Note.* Spatial lag variables were the average outcomes for neighboring block groups in the full sample during a given time period, based on queen’s contiguity of the block group polygons.

a Incident rate ratio (IRR) using negative binomial regression with two-way fixed effects and matched sample. For model specifications, see Methods.
